# Supplementary material for: Diaporthe and Diplodia Species Associated with Walnut (Juglans regia L.) in Hungarian Orchards
Source: MDPI journal article supplement (doi:10.3390/horticulturae9020205), 2023-02-03
Supplement: s1 [file s1]

**Supplement Table S1:** Isolates and sequences from other studies used in phylogenetic analyses for this study.

| Species                       | No. of isolate       | GenBank accession number * |                |
|-------------------------------|----------------------|----------------------------|----------------|
|                               |                      | ITS                        | TEF-1 $\alpha$ |
| <i>Diplodia allocellula</i>   | CMW36469_TYPE        | NR_111701                  | JQ239385       |
| <i>Diplodia allocellula</i>   | CMW36468             | JQ239397                   | JQ239384       |
| <i>Diplodia allocellula</i>   | CMW36470             | JQ239399                   | JQ239386       |
| <i>Diplodia citricarpa</i>    | CBS124714            | MT587336                   | MT592039       |
| <i>Diplodia citricarpa</i>    | CBS124713            | MT587335                   | MT592038       |
| <i>Diplodia corticola</i>     | CBS112549_ex-type    | NR_111152                  | AY573227       |
| <i>Diplodia corticola</i>     | CBS112547            | AY259110                   | DQ458872       |
| <i>Diplodia intermedia</i>    | CBS124462            | MH863374                   | GQ923826       |
| <i>Diplodia mutila</i>        | CBS112553_ex-epitype | MW810279                   | AY573219       |
| <i>Diplodia mutila</i>        | CBS230.30            | MW810264                   | DQ458869       |
| <i>Diplodia pseudoseriata</i> | CBS124906            | MH863419                   | EU863181       |
| <i>Diplodia pseudoseriata</i> | CBS124931            | MH863427                   | FJ888444       |
| <i>Diplodia pseudoseriata</i> | CBS124907_ex-type    | MT587358                   | EU863179       |
| <i>Diplodia sapinea</i>       | CBS136778            | MT587364                   | MT592070       |
| <i>Diplodia sapinea</i>       | CBS129172            | MT587363                   | MT592069       |
| <i>Diplodia sapinea</i>       | CBS393.84_ex-type    | NR152452                   | DQ458880       |
| <i>Diplodia sapinea</i>       | CBS591.84            | MT587367                   | MG015730       |
| <i>Diplodia seriata</i>       | CBS112555_ex-type    | AY259094                   | AY573220       |
| <i>Diplodia seriata</i>       | CBS119049            | DQ458889                   | DQ458874       |
| <i>Diplodia seriata</i>       | CPC29849             | MT587390                   | MT592101       |
| <i>Diplodia seriata</i>       | CBS140890            | MT587386                   | MT592097       |
| <i>Diplodia seriata</i>       | CBS140891            | MT587387                   | MT592098       |
| <i>Diplodia seriata</i>       | CBS100565            | MT587370                   | MT592076       |
| <i>Diplodia seriata</i>       | CBS121485            | EU650671                   | MT592093       |

\* ITS = internal transcribed spacer, tef1 = translation elongation factor 1- $\alpha$ .
